# Supplementary material for: Efficacy of Jasminum subtriplinerve Extract against 7,12-Dimethylbenz[α]anthracene-Induced Cancer in Mice
Source: PubMed Central journal article supplement (PMC11637824; doi:10.4014/jmb.2407.07045), 2024-09-20

## Supplementary Figures

### Efficacy of *Jasminum subtriplinerve* extract against 7,12-dimethylbenz[*a*]anthracene-induced cancer in mice

Phan Hong Minh<sup>1,2</sup>, Pham Thi Van Anh<sup>2</sup>, Bui Thanh Tung<sup>1</sup>, Ho My Dung<sup>1</sup>, Tran Thi Thu Trang<sup>6</sup>, Pham Thi Hong Nhung<sup>1</sup>, Nguyen Thi Hang<sup>3</sup>, Nguyen Thi Minh Nguyet<sup>4</sup>, Nguyen Viet Phong<sup>5</sup>, Le Ba Vinh<sup>5\*</sup>, and Mai Phuong Thanh<sup>2</sup>

<sup>1</sup> *University of Medicine and Pharmacy, Vietnam National University, Hanoi, Vietnam*

<sup>2</sup> *Department of Pharmacology, Hanoi Medical University, Hanoi, Vietnam*

<sup>3</sup> *National Institute of Medical Materials (NIMM), Hanoi, 11022, Vietnam*

<sup>4</sup> *Vinmec- VinUni Institute of Immunology, Vinmec Healthcare System, Hanoi, Vietnam*

<sup>5</sup> *Institute of Marine Biochemistry, Vietnam Academy of Science and Technology, Hanoi, Vietnam*

<sup>6</sup> *Hanoi University Pharmacy, Hanoi, Vietnam*

\*Corresponding author.

Prof. Mai Phuong Thanh.

E-mail address: [maiphuongthanh@hmu.edu.vn](mailto:maiphuongthanh@hmu.edu.vn) (M.P. Thanh).

Dr. Le Ba Vinh.

E-mail address: [lebavinh.imbc@gmail.com](mailto:lebavinh.imbc@gmail.com) (L.B. Vinh).

1. Cell viability on normal cells (RAW 264.7 cells)

The safety of compound on cell viability was determined by an MTT assay. The macrophage murine cells (RAW 264.7) were seeded into a 96-well plate at a density of  $1 \times 10^5$  cells/ well. Different concentrations of EtOAc fraction ranging from 6.25  $\mu$ M to 100  $\mu$ M, respectively were treated for cells for 6h. Subsequently, 10  $\mu$ L of MTT stock (Sigma Aldrich) (5mg/ml) was added to each well for 2h. After removing the supernatant, the formazan crystals were dissolved by 100 $\mu$ l of DMSO at room temperature. The absorbance was measured by microreader at 570nm.

2. Toxicology dose

Female Swiss albino mice aged 6 weeks of age were divided into two groups. All mice in group 1 were treated with 200 $\mu$ L of saline solution, whereas mice in group 2 were administered with 200 $\mu$ L EtOAc fraction of *J. subtriplinerve* daily for 8 weeks. Mice were sacrificed 1 day after the last dose. Changes in body weight and survival rate were measured during experimental period. Blood samples were collected for assays hematological parameters analysis.

**Supple Fig S1. Cytotoxicity on Raw 264.7 murine macrophage cells.**

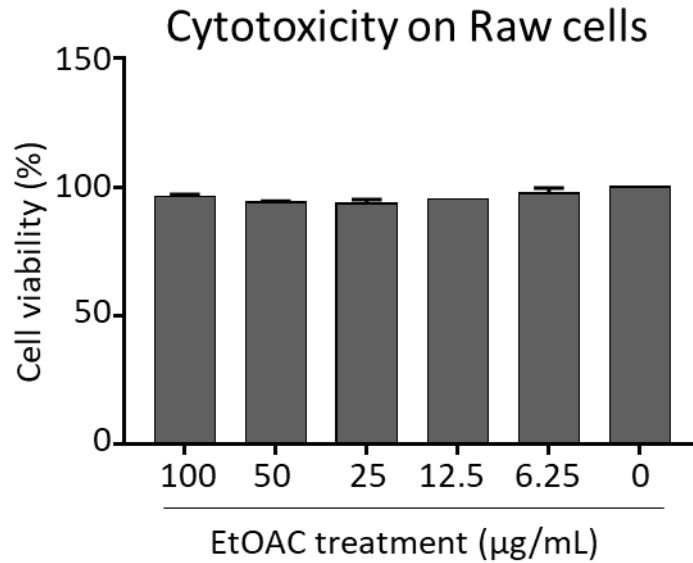

**Supple Fig S2. Dose toxicity effects.** Female mice were administered *J. subtriplinerve* daily for 8 weeks and clinical observations were made. **(A)** Changes in body weight. **(B)** Changes in hematological results. **(C)** Survival rate. **(D)** Changes in liver and kidney tissues.

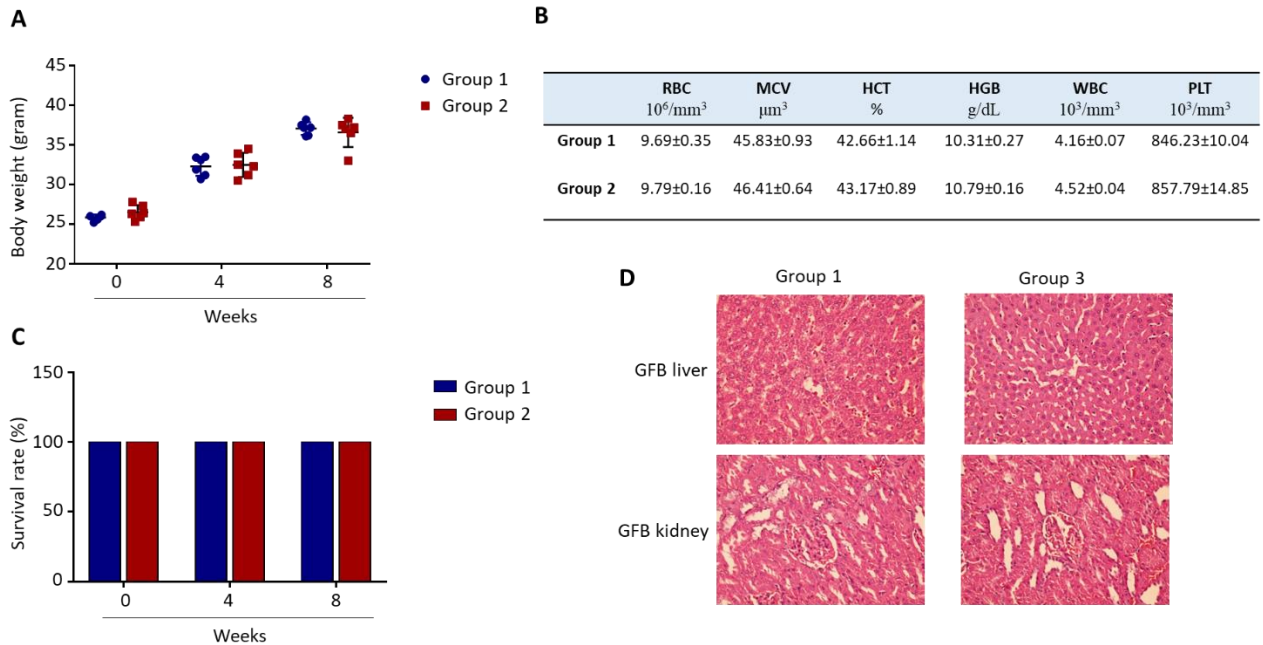

Supplement: jmb-34-11-2173-supple.pdf [file jmb-34-11-2173-supple.pdf]
